# Supplementary material
Source: PubMed Central journal article supplement (PMC4028963)
Supplement: NIHMS549951-supplement-1.pdf [file NIHMS549951-supplement-1.pdf]

Supplementary Figure S1.

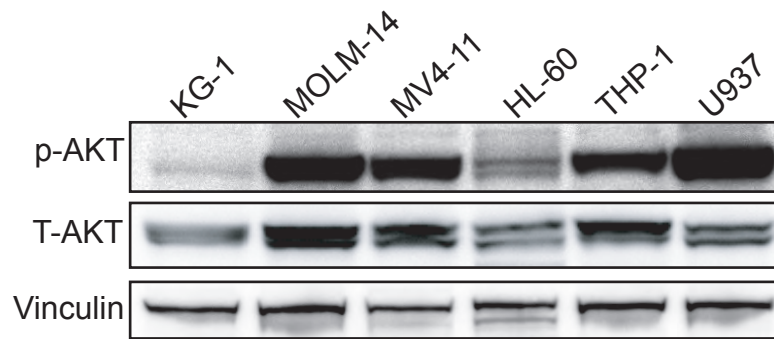



Supplementary Figure S3.

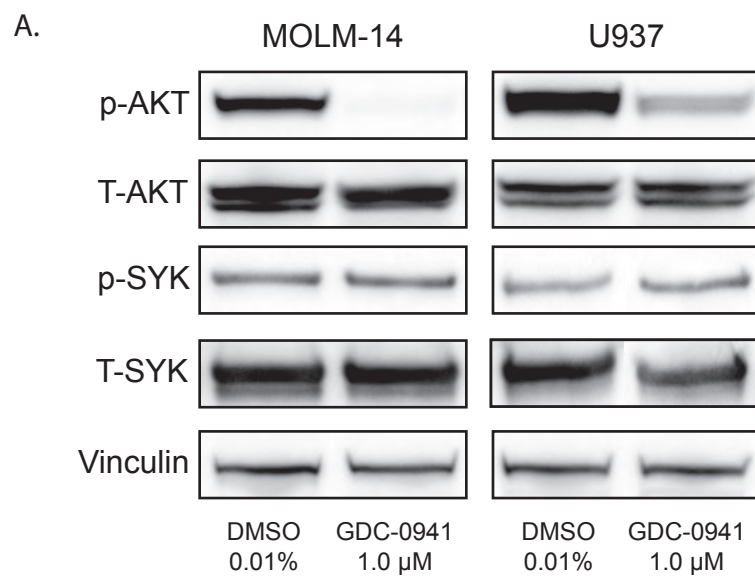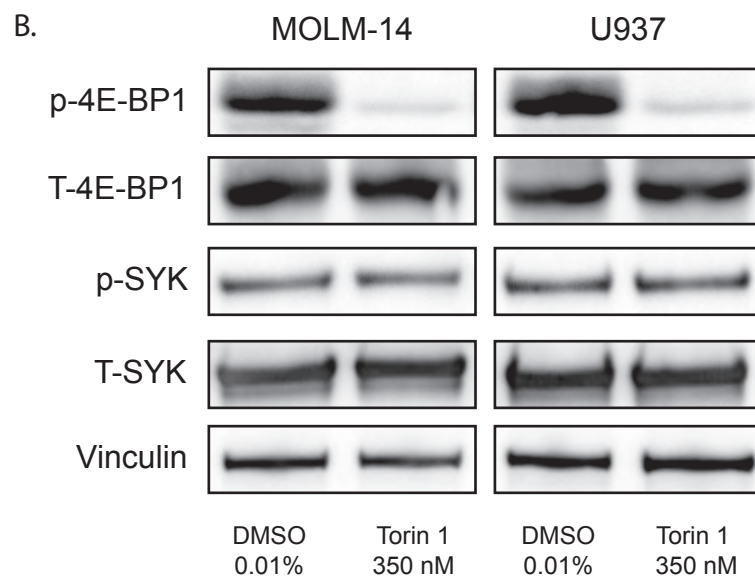

# Supplementary Figure S4.

A.

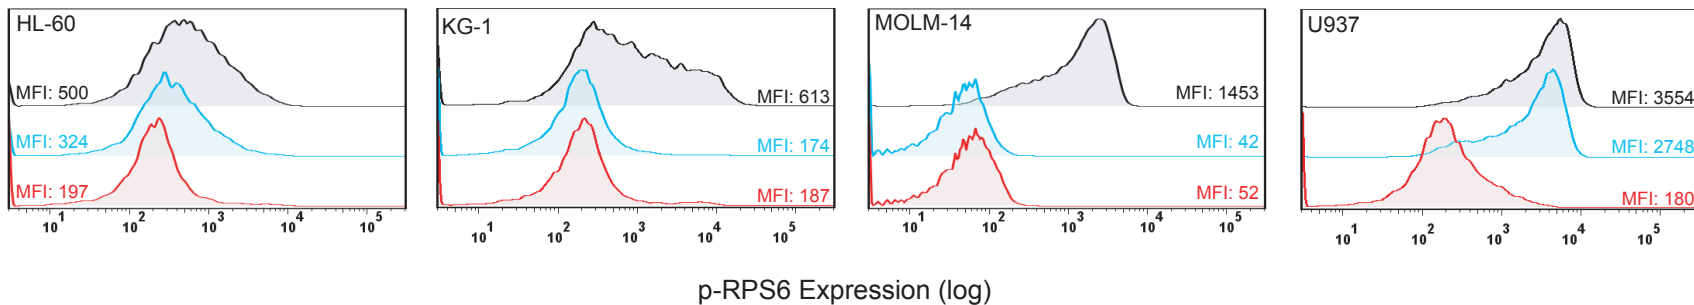

B.

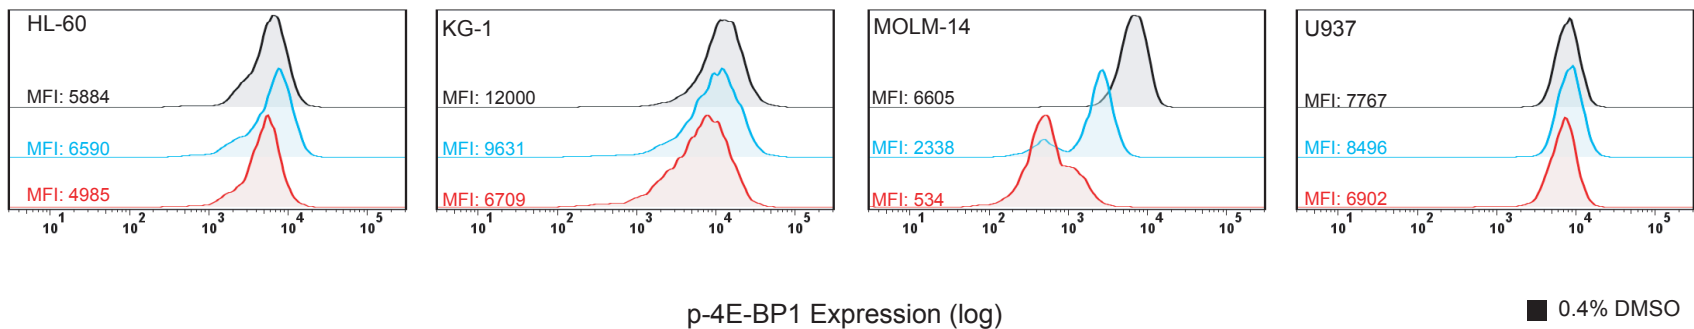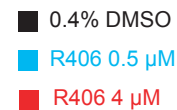

# Supplementary Figure S5.

A.

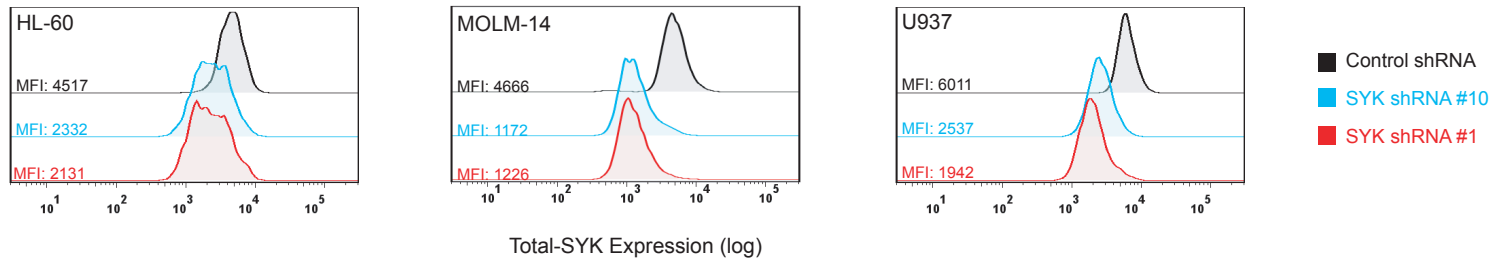

B.

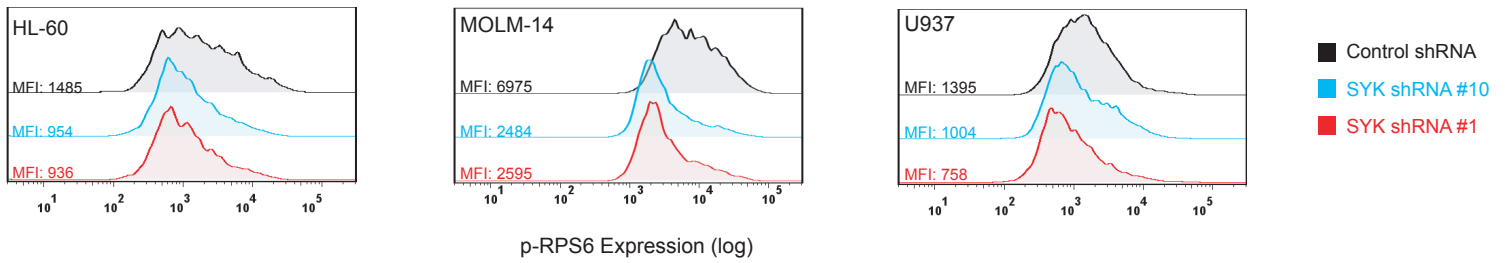

C.

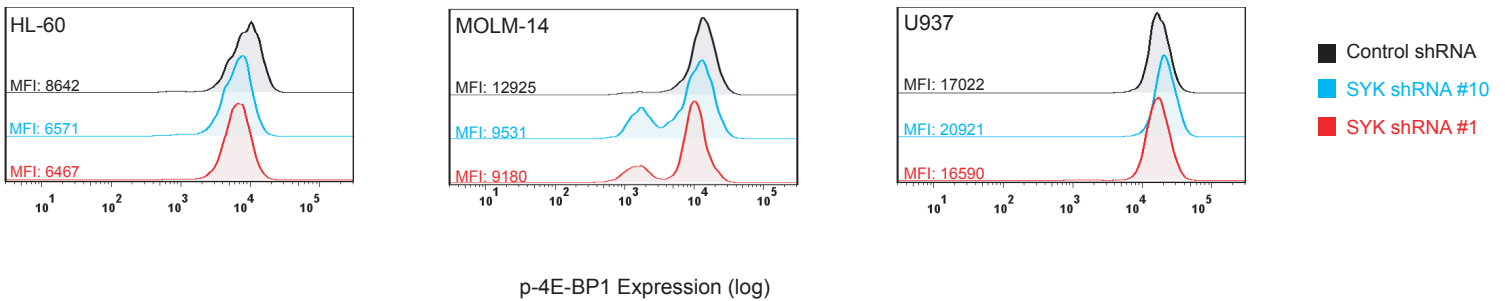

Supplementary Figure S6.

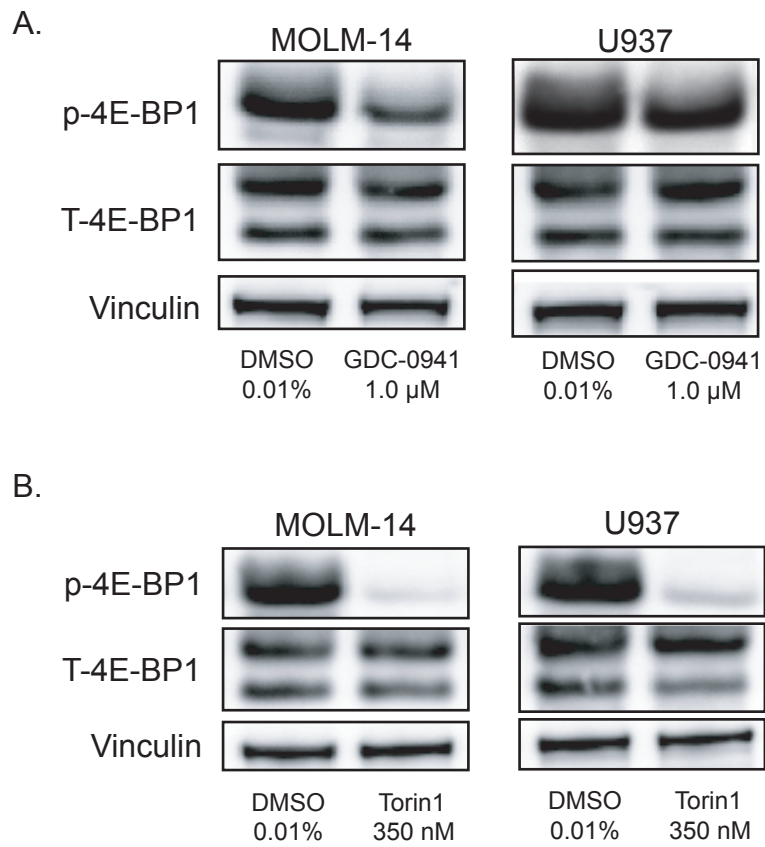

Supplementary Figure S7.

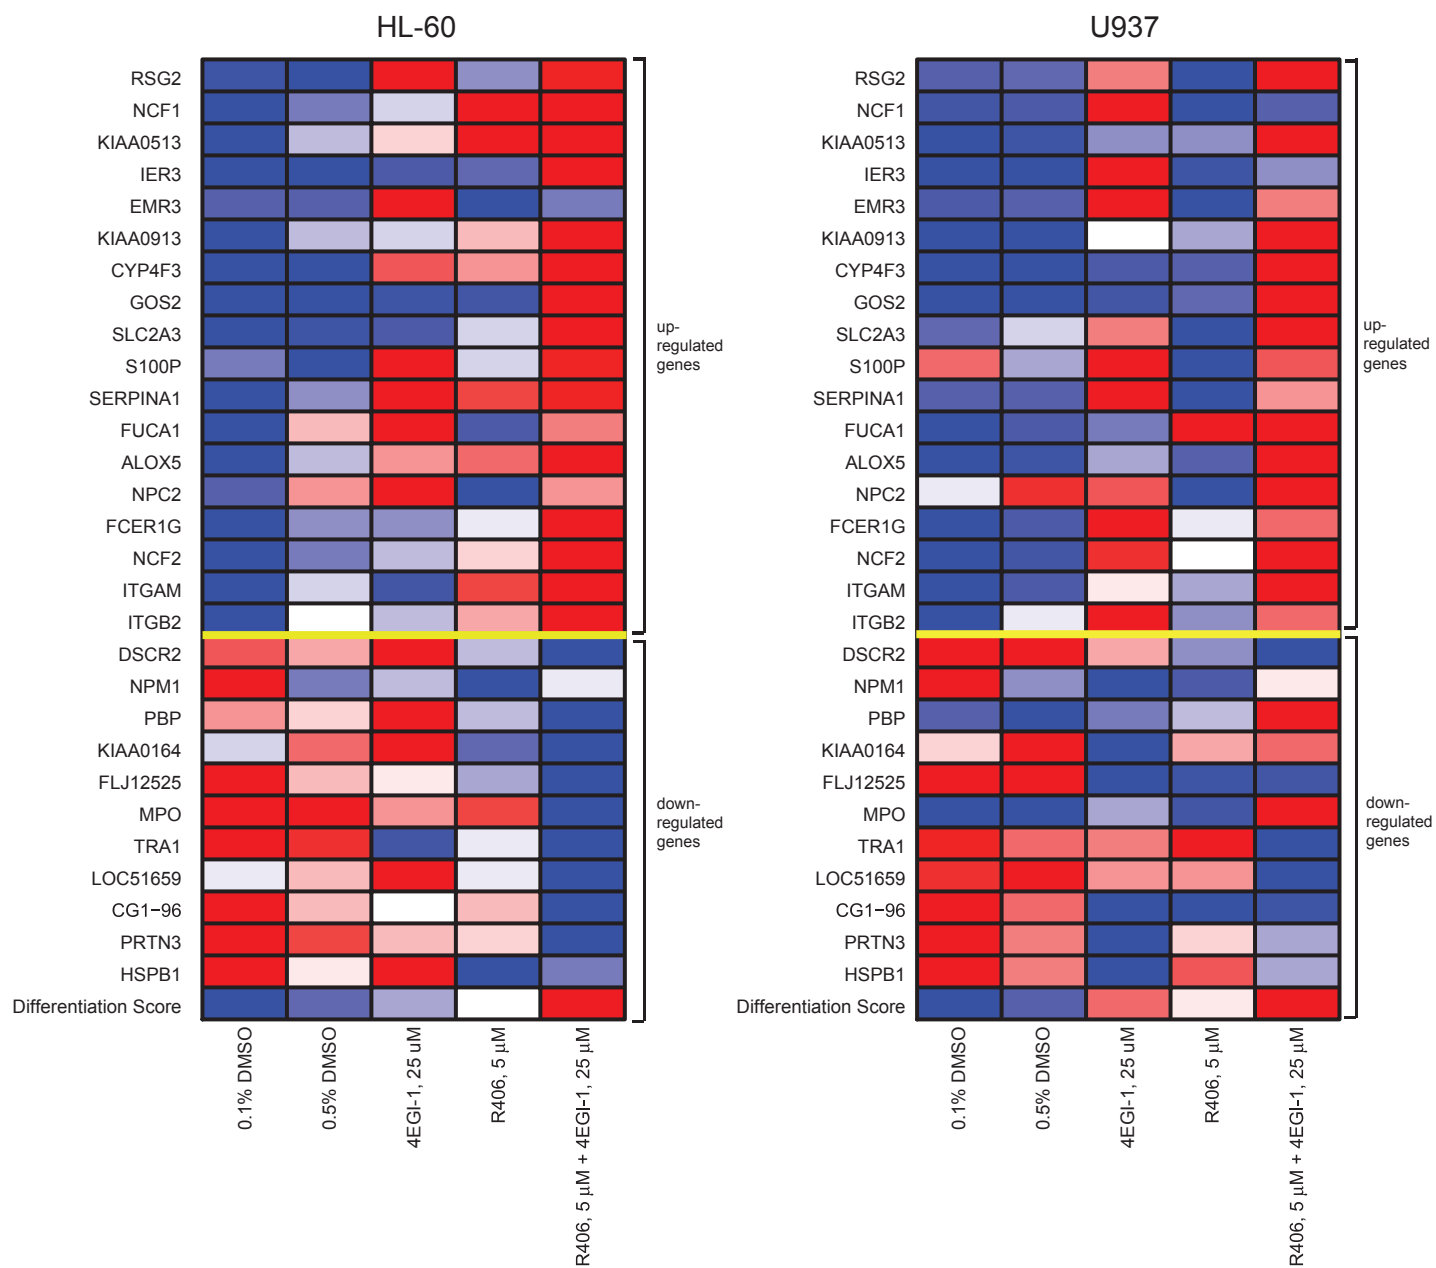

Supplementary Figure S8.

A.

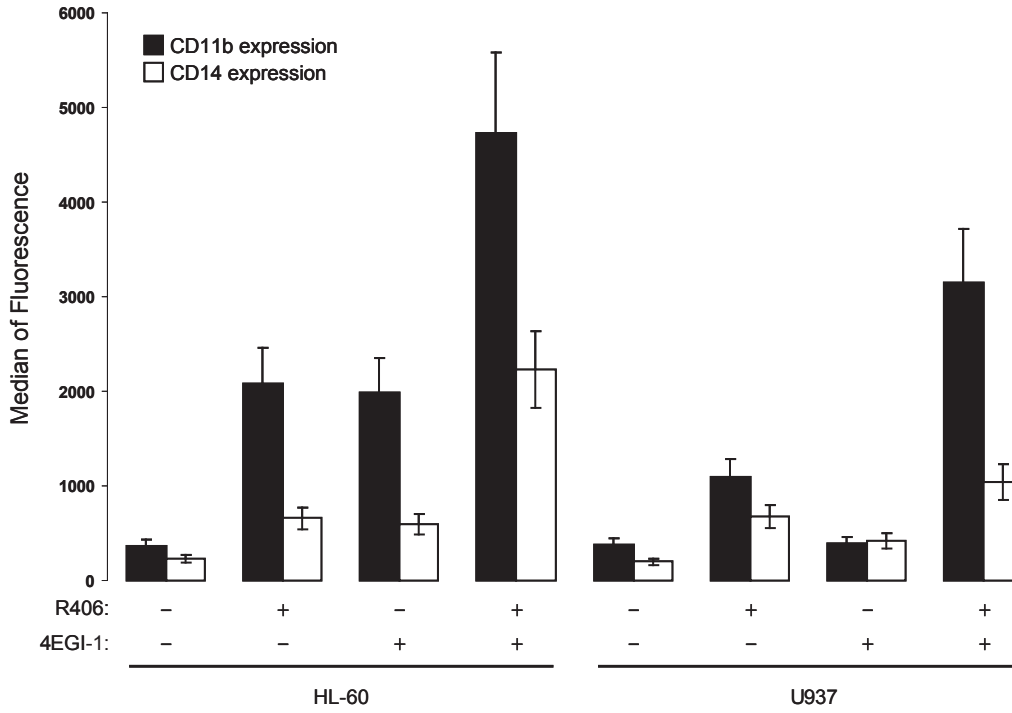

B.

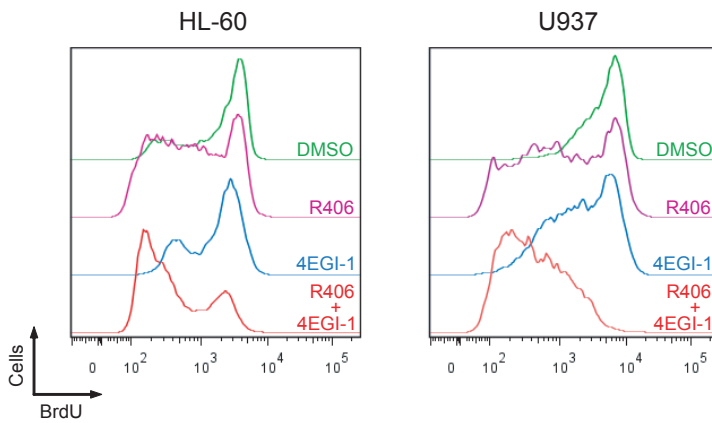

C.

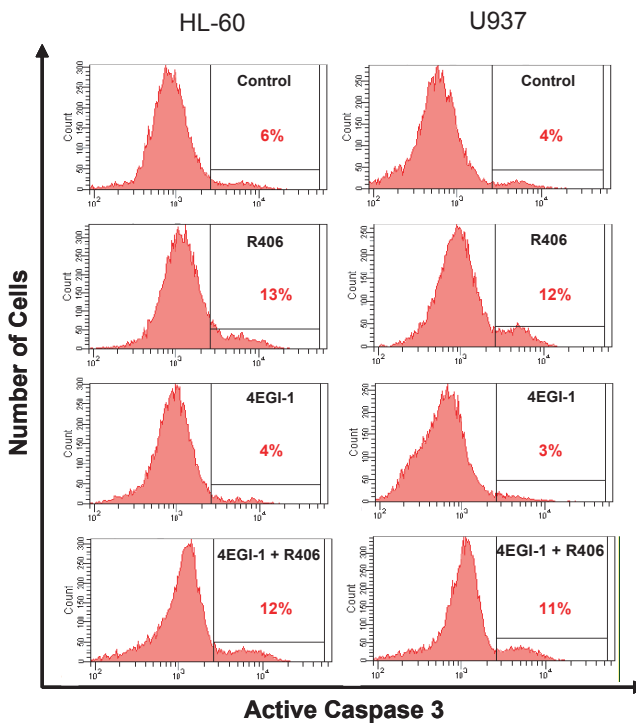



Supplementary Figure S9.

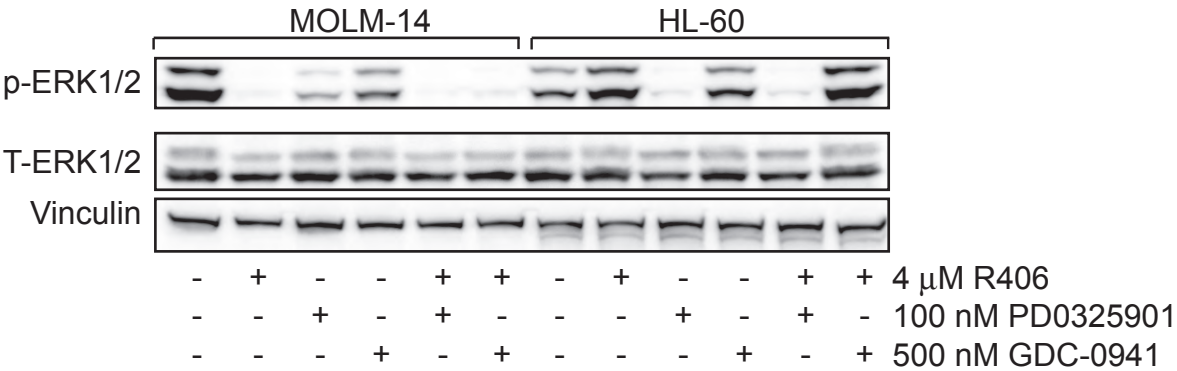

Supplementary Figure S10.

A.

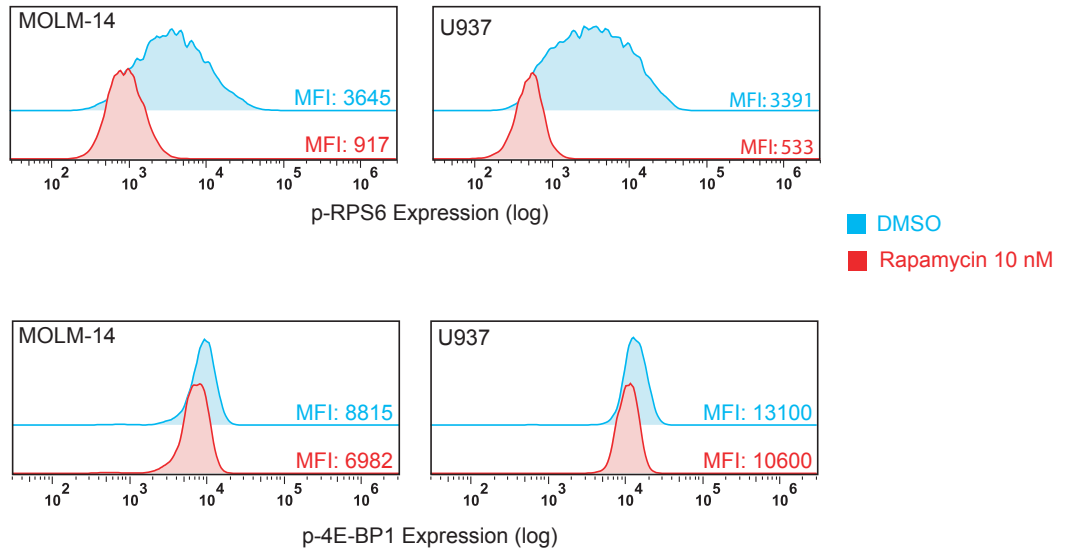

B.

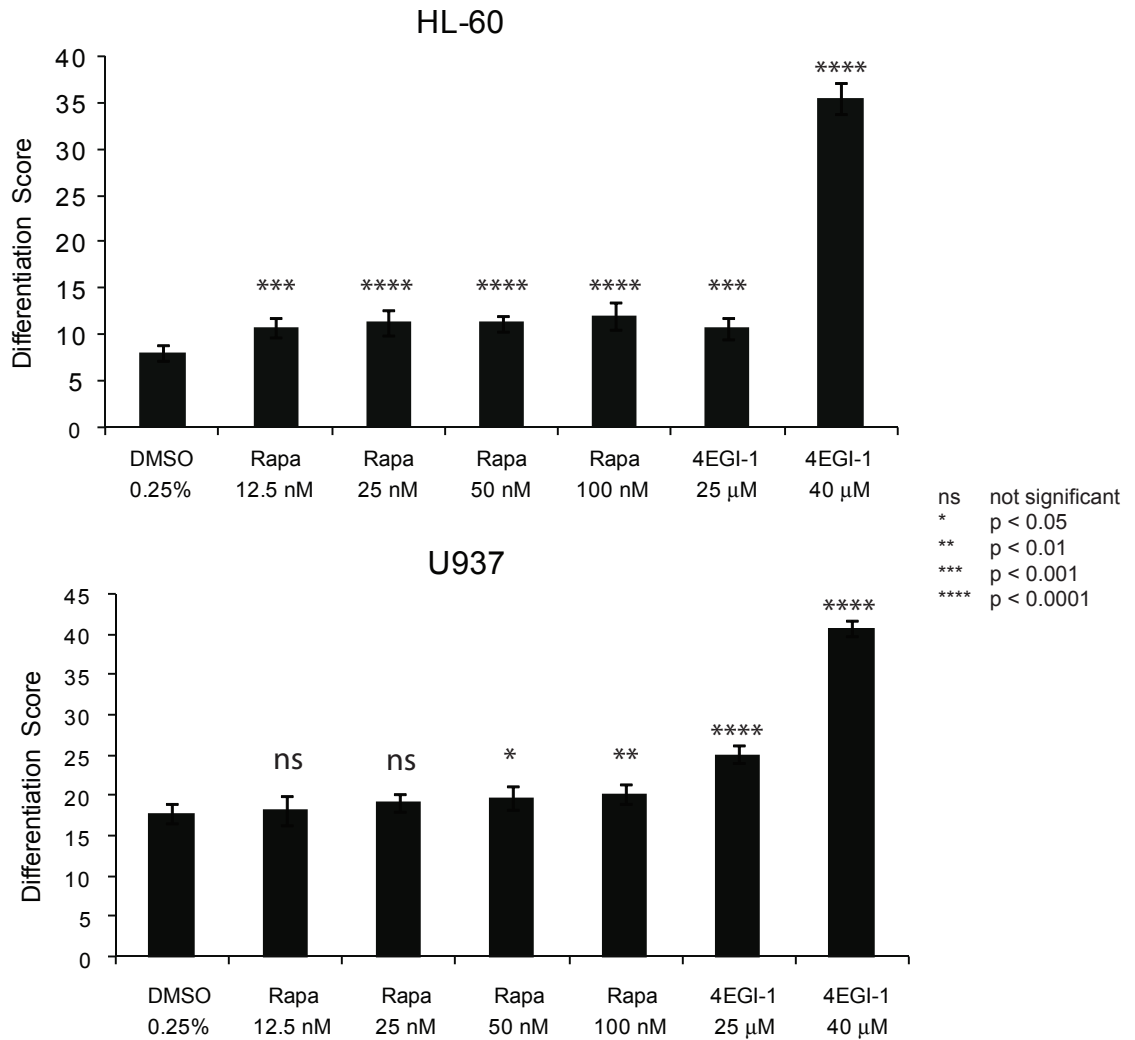

# Supplementary Table S1.

## Differentiation Signature (32-Gene Signature)

| GENE NAME | RefSeq       | PROBE SEQUENCE                                                                                                                 |
|-----------|--------------|--------------------------------------------------------------------------------------------------------------------------------|
| RGS2      | NM_002923    | 5'-TAATACGACTCACTATAGGGCTTTAATCTCAATCAATACAAATCAGGGAATAGTGGTCTGAAC-3'<br>5'-Phos-GTGGTGTCTCACTCTGAAAATCCCTTTAGTGAGGGTTAAT-3'   |
| NCF1      | NM_000265    | 5'-TAATACGACTCACTATAGGGCTTTATCAATACACTACAATCATGGACGCCGAGGGCAGCCCC-3'<br>5'-Phos-GACCCTGTCCAGCGGGCTCCCTTTAGTGAGGGTTAAT-3'       |
| KIAA0513  | NM_014732    | 5'-TAATACGACTCACTATAGGGTACACTTTATCAAACTTCAACATCCACCAGATCTTCTCTGTGG-3'<br>5'-Phos/CATTTTTGCAATCTTGTGTCTCCCTTTAGTGAGGGTTAAT-3'   |
| IER3      | NM_003897    | 5'-TAATACGACTCACTATAGGGTACATTACCAATAATCTTCAAAATCGCTGTCAACGAGCGACTGTC-3'<br>5'-Phos-GAGATCGCCTAGTAGTCTTCCCTTTAGTGAGGGTTAAT-3'   |
| EMR3      | NM_032571    | 5'-TAATACGACTCACTATAGGGCAATTCAAAACACAAATCAATCCGATGGGCTGACTCAAAAC-3'<br>5'-Phos-CCAGTGAGGGGGATGTTTTTCCCTTTAGTGAGGGTTAAT-3'      |
| KIAA0913  | NM_015037    | 5'-TAATACGACTCACTATAGGGTAATCTTCTATATCAACATCTTACTGGGAGGGGGCGTGGGTGG-3'<br>5'-Phos-CCTCTGGTATTTATTTGGCATCCCTTTAGTGAGGGTTAAT-3'   |
| CYP4F3    | NM_000896    | 5'-TAATACGACTCACTATAGGGTACTTCACTTCACTTCACTGATTTTCTATCTATTC-3'<br>5'-Phos-CATGTTGGACCAATACCACATCCCTTTAGTGAGGGTTAAT-3'           |
| PSMG1     | NM_003720    | 5'-TAATACGACTCACTATAGGGTCAATTACCTTTTCAATACAATACAACAACCGAATATAGTACAC-3'<br>5'-Phos-GACCTTCTGCAGCAGTCTTCCCTTTAGTGAGGGTTAAT-3'    |
| NPM1      | NM_002520    | 5'-TAATACGACTCACTATAGGGCTTTTCAATTACTTCAAACTTCTGATGAGGACATAGTAGTAGC-3'<br>5'-Phos-GTGTGTGACAGATGGAATGTCCCTTTAGTGAGGGTTAAT-3'    |
| PEBP1     | NM_002567    | 5'-TAATACGACTCACTATAGGGTACTCAAATCTACACTTTTTTCCAGAAAAGCTGGCTGGAGTTG-3'<br>5'-Phos-CTGAATGTTGCATTAATTGTTCCCTTTAGTGAGGGTTAAT-3'   |
| ANP32E    | NM_030920    | 5'-TAATACGACTCACTATAGGAAAGTTGAGTATTGATTTGAAAAGATATTTGTAGAAGTTTTTCG-3'<br>5'-Phos-GTCCTATTTAATGCTTTTGTCCCTTTAGTGAGGGTTAAT-3'    |
| BCLAF1    | NM_001077440 | 5'-TAATACGACTCACTATAGGGTCACTTTTCAATCAACTTAAATCAAATAACTCACTGATACCTG-3'<br>5'-Phos-CGTTAACATACTTTGTTTTGTCCCTTTAGTGAGGGTTAAT-3'   |
| LAS1L     | NM_031206    | 5'-TAATACGACTCACTATAGGGCAATTTCACTATTCATTCATTTCACTGGGAGACGCCTGGATCAG-3'<br>5'-Phos-CCACATCAACTCAGTTGTCCTCCCTTTAGTGAGGGTTAAT-3'  |
| MPO       | NM_000250    | 5'-TAATACGACTCACTATAGGGCTTCTACATTTTCAACAACATTTCTCACCCTGATTTCTTG-3'<br>5'-Phos-CTTATTCACTGAAGTCTCCTCCCTTTAGTGAGGGTTAAT-3'       |
| HSP90B1   | NM_003299    | 5'-TAATACGACTCACTATAGGGCTATCTTCATATTCACTATAAACGGAGAGACTTGTGGATG-3'<br>5'-Phos-CCCCTAATCCCCTTCTCCCTCCCTTTAGTGAGGGTTAAT-3'       |
| GIN52     | NM_016095    | 5'-TAATACGACTCACTATAGGGCTTTCAATTACAATACTCATTACAGCCAAACATGCTGACCCGGTG-3'<br>5'-Phos-CTTATCCTCTAAGCCCTGATCCCTTTAGTGAGGGTTAAT-3'  |
| RRP7A     | NM_015703    | 5'-TAATACGACTCACTATAGGGTCATTTTCAACAATCAATTACTCAACCTCAATGCAAAAGCCCTTG-3'<br>5'-Phos-CTGGCAACGAAAAGCCCTCCTCCCTTTAGTGAGGGTTAAT-3' |
| PRTN3     | NM_002777    | 5'-TAATACGACTCACTATAGGGTCATTTCAATCAATCATCAACAATCTCGTGATCTGGGGATGTG-3'<br>5'-Phos-CCACCGCCTTTTCCCTGACTCCCTTTAGTGAGGGTTAAT-3'    |
| HSPB1     | NM_001537    | 5'-TAATACGACTCACTATAGGGTACACTTTAAACTTACTACACTAAAAATCCGATGAGACTGCCGC-3'<br>5'-Phos-CAAGTAAAGCCTTAGCCTGGTCCCTTTAGTGAGGGTTAAT-3'  |
| G0S2      | NM_015714    | 5'-TAATACGACTCACTATAGGGCTATTACACTTTAAACATCAATACTAGAAGTACCTACCACAAG-3'<br>5'-Phos-CATCCACCAAGGAGTTGGTCCCTTTAGTGAGGGTTAAT-3'     |
| SLC2A3    | NM_006931    | 5'-TAATACGACTCACTATAGGGCTTTCTATTCATCAATAACAAACACTTCATGCAACTTTCTGG-3'<br>5'-Phos-CTCCTCAACAGTAGGTTGGTCCCTTTAGTGAGGGTTAAT-3'     |
| S100P     | NM_005980    | 5'-TAATACGACTCACTATAGGGCTTTCTATCTTCTCACTCAATAACTCACAGATTCCTGGCAGAGC-3'<br>5'-Phos-CATGGTCCCAGGCTTCCCAATCCCTTTAGTGAGGGTTAAT-3'  |
| SERPINA1  | NM_000295    | 5'-TAATACGACTCACTATAGGGAATCATACTCAACTAATCAATCAATTTACATTTACCCAAACTGTC-3'<br>5'-Phos-CATTACTGGAACCTATGATCTCCCTTTAGTGAGGGTTAAT-3' |
| FUCA1     | NM_000147    | 5'-TAATACGACTCACTATAGGGAATCTACACTAACAATTTCAATACGAAAGGCTTACCAGGCTG-3'<br>5'-Phos-CTATGTCAACTTCTCAGAAATCCCTTTAGTGAGGGTTAAT-3'    |
| ALOX5     | NM_000698    | 5'-TAATACGACTCACTATAGGGCTACTATACACTTACTATACTTTCTCAGCATTTCCACACAAG-3'<br>5'-Phos-CAGCAACGAAATCAGACTCCCTTTAGTGAGGGTTAAT-3'       |
| NPC2      | NM_006432    | 5'-TAATACGACTCACTATAGGGTAACTAACAATACTTAAACAGAAACTGAGCTCCGGGTG-3'<br>5'-Phos-GCTGGTTCAGTGGTGTCTCCCTTTAGTGAGGGTTAAT-3'           |
| FCER1G    | NM_004106    | 5'-TAATACGACTCACTATAGGGTCATTTACCAATCTTCTTTATACCAGGAACAGGAGACTTAC-3'<br>5'-Phos-GAGACTCTGAAGCATGAGAATCCCTTTAGTGAGGGTTAAT-3'     |
| NCF2      | NM_000433    | 5'-TAATACGACTCACTATAGGGCTACAACAACAACAATTTCAAAAAGGGCAGAGAGTCTTC-3'<br>5'-Phos-CAGGACTGATCCTGTTTCTTCCCTTTAGTGAGGGTTAAT-3'        |
| ITGAM     | NM_000632    | 5'-TAATACGACTCACTATAGGGTACACTTTCTTCTTCTTCTTCTTGGTTCCCTCAGACAGATTC-3'<br>5'-Phos-CAGGCATGTGCAAGTGTATTCCTTTAGTGAGGGTTAAT-3'      |
| ITGB2     | NM_000211    | 5'-TAATACGACTCACTATAGGGTACACAATCTTTTCAATACATAGAAAATCCAGTTATTTCCG-3'<br>5'-Phos-CCCTCAAATGACAGCCATGTCCCTTTAGTGAGGGTTAAT-3'      |
| GAPDH     | NM_002046    | 5'-TAATACGACTCACTATAGGGTCATTCATATACATACCAATTCATATCTCCCTCCTCACAGTTG-3'<br>5'-Phos-CCATGTAGACCCCTTGAAGATCCCTTTAGTGAGGGTTAAT-3'   |
| HNRNPAB   | NM_031266    | 5'-TAATACGACTCACTATAGGGTCAATCATCTTTATCTTCAACTGCCTGGACCTGGACCTG-3'<br>5'-Phos-GTTGTAAGAGTAAATGTATCCCTTTAGTGAGGGTTAAT-3'         |

Supplementary Table S2.  
 Primary Patient Sample Characteristics

| Patient | Diagnosis                                                | Cytogenetics                                     |
|---------|----------------------------------------------------------|--------------------------------------------------|
| 1       | New diagnosis M5-AML                                     | 46 XY                                            |
| 2       | Progressive MDS (RAEB-2)                                 | 46 XY                                            |
| 3       | New diagnosis AML with monocytic differentiation         | 46,XY,t(11;17)(q23;q12)                          |
| 4       | New diagnosis mixed phenotype acute leukemia (T/myeloid) | 49,XX,+4,+10,+19[8]/46,XX [cp12]                 |
| 5       | Relapsed AML                                             | 47,XY,+11[15]/47,XY,+del(11)(q11q21)[3]/46,XY[2] |

Supplementary Table S3.  
Significance values for viability comparisons in Figure 4A.

|       |                                  | One-way analysis of variance          |                                  | p VALUE |       |
|-------|----------------------------------|---------------------------------------|----------------------------------|---------|-------|
|       |                                  | Bonferroni's Multiple Comparison Test |                                  | Day 3   | Day 6 |
| HL-60 | Control shRNA + DMSO             | x                                     | Control shRNA + GDC-0941, 1000nM | ***     | ***   |
| HL-60 | Control shRNA + DMSO             | x                                     | Control shRNA + Torin 1, 250nM   | ***     | ***   |
| HL-60 | Control shRNA + DMSO             | x                                     | Control shRNA + 4EGI-1, 25µM     | ***     | ***   |
| HL-60 | Control shRNA + DMSO             | x                                     | SYK shRNA#1 + DMSO               | ***     | ***   |
| HL-60 | Control shRNA + DMSO             | x                                     | SYK shRNA#1 + GDC-0941, 1000nM   | ***     | ***   |
| HL-60 | Control shRNA + DMSO             | x                                     | SYK shRNA#1 + Torin 1, 250nM     | ***     | ***   |
| HL-60 | Control shRNA + DMSO             | x                                     | SYK shRNA#1 + 4EGI-1, 25µM       | ***     | ***   |
| HL-60 | Control shRNA + GDC-0941, 1000nM | x                                     | SYK shRNA#1 + GDC-0941, 1000nM   | ***     | ***   |
| HL-60 | Control shRNA + Torin 1, 250nM   | x                                     | SYK shRNA#1 + Torin 1, 250nM     | ***     | ***   |
| HL-60 | Control shRNA + 4EGI-1, 25µM     | x                                     | SYK shRNA#1 + 4EGI-1, 25µM       | ***     | ***   |
| HL-60 | SYK shRNA#1 + DMSO               | x                                     | SYK shRNA#1 + GDC-0941, 1000nM   | ***     | ***   |
| HL-60 | SYK shRNA#1 + DMSO               | x                                     | SYK shRNA#1 + Torin 1, 250nM     | **      | ***   |
| HL-60 | SYK shRNA#1 + DMSO               | x                                     | SYK shRNA#1 + 4EGI-1, 25µM       | ***     | ***   |
|       |                                  |                                       |                                  | Day 3   | Day 6 |
| U937  | Control shRNA + DMSO             | x                                     | Control shRNA + GDC-0941, 1000nM | ***     | ***   |
| U937  | Control shRNA + DMSO             | x                                     | Control shRNA + 4EGI-1, 25µM     | ***     | ***   |
| U937  | Control shRNA + DMSO             | x                                     | SYK shRNA#1 + DMSO               | ***     | ***   |
| U937  | Control shRNA + DMSO             | x                                     | SYK shRNA#1 + GDC-0941, 1000nM   | ***     | ***   |
| U937  | Control shRNA + DMSO             | x                                     | SYK shRNA#1 + 4EGI-1, 25µM       | ***     | ***   |
| U937  | Control shRNA + GDC-0941, 1000nM | x                                     | SYK shRNA#1 + DMSO               | ***     | ***   |
| U937  | Control shRNA + GDC-0941, 1000nM | x                                     | SYK shRNA#1 + GDC-0941, 1000nM   | ***     | ***   |
| U937  | Control shRNA + 4EGI-1, 25µM     | x                                     | SYK shRNA#1 + DMSO               | ***     | ***   |
| U937  | Control shRNA + 4EGI-1, 25µM     | x                                     | SYK shRNA#1 + 4EGI-1, 25µM       | ***     | ***   |
| U937  | SYK shRNA#1 + DMSO               | x                                     | SYK shRNA#1 + GDC-0941, 1000nM   | ns      | ***   |
| U937  | SYK shRNA#1 + DMSO               | x                                     | SYK shRNA#1 + 4EGI-1, 25µM       | ns      | ***   |
| U937  | Control shRNA + DMSO             | x                                     | Control shRNA + Torin 1, 50nM    | ***     | ***   |
| U937  | Control shRNA + DMSO             | x                                     | SYK shRNA#1 + DMSO               | ***     | ***   |
| U937  | Control shRNA + DMSO             | x                                     | SYK shRNA#1 + Torin 1, 50nM      | ***     | ***   |
| U937  | Control shRNA + Torin 1, 50nM    | x                                     | SYK shRNA#1 + Torin 1, 50nM      | ***     | ***   |
| U937  | SYK shRNA#1 + DMSO               | x                                     | SYK shRNA#1 + Torin 1, 50nM      | ***     | ***   |
|       |                                  |                                       |                                  |         |       |
|       | ns not significant               |                                       |                                  |         |       |
|       | ** p<0.01                        |                                       |                                  |         |       |
|       | *** p<0.001                      |                                       |                                  |         |       |

## **Supplementary Figure Legends**

### **Supplementary Figure S1.**

AKT Activation in AML cell lines. Basal levels of phosphorylated AKT in six untreated AML cell lines. AKT activation was assessed by immunoblotting to p-AKT (Ser473).

### **Supplementary Figure S2.**

R406 inhibits SYK and modulates AKT and mTOR activation. (a) Cells from two AML cell lines were treated for 24 hours with R406 versus DMSO and SYK phosphorylation at Tyr525/526 evaluated by intracellular flow cytometry. (b) Western blot of p-AKT (Ser473) and p-mTOR (Ser2448) in MOLM-14 treated with R406 for 6 hours. (c) Cells were treated with 4  $\mu$ M R406 for various time points, as indicated, and analyzed for p-SYK (Tyr525/526), p-AKT (Ser473), p-mTOR (Ser2448), p-RPS6 (Ser240/244) and p-4E-BP1 (Thr37/46). The x-axis denotes expression (log scale) for each protein of interest, and each is labeled with the median fluorescent intensity (MFI) per condition.

### **Supplementary Figure S3.**

Feedback on SYK is not observed with inhibitors of PI3K or mTORC1/2. (a) MOLM-14 and U937 cells were treated with GDC-0941 or vehicle for 24 hours prior to western blot analysis with p-AKT Ser (473) or p-SYK (Tyr525/526). (b) MOLM-14 and U937 cells were treated with Torin 1 or vehicle for 24 hours prior to western blot analysis with p-4E-BP1 (Thr37/46) or p-SYK (Tyr525/526). For p-SYK analysis, cell extracts were first immunoprecipitated with antibody to SYK before western blotting with p-SYK.

#### **Supplementary Figure S4.**

Chemical inhibition of SYK leads to more consistent inhibition of RPS6 than 4E-BP1 when assessed by intracellular phospho-flow cytometry. Four AML cell lines were treated with either vehicle (DMSO) or R406 (0.5  $\mu$ M and 4  $\mu$ M) for 24 hours and levels of (a) RPS6 and (b) 4E-BP1 phosphorylation were assessed by intracellular phospho-flow cytometry. Phosphorylation of RPS6 at the Ser240/244 site was inhibited across all cell lines with R406 treatment, but the effects on 4E-BP1 T37/46 phosphorylation were more variable. The histograms for each condition are representative of at least two biological replicates across up to 3 repeated experiments. The x-axis denotes expression (log scale) for each protein of interest, and each is labeled with the median fluorescent intensity (MFI) per condition.

#### **Supplementary Figure S5.**

Genetic inhibition of SYK leads to more consistent alterations of RPS6 than 4E-BP1 when assessed by phospho-flow cytometry. RPS6 and 4E-BP1 phosphorylation were assessed in three AML cell lines 72 hours after lentiviral infection with two *SYK*-directed shRNAs or a control shRNA. (a) Immunostaining for total-SYK shows that expression was decreased with both hairpins in each cell line. (b) RPS6 phosphorylation at the Ser240/244 site was consistently inhibited in all cell lines tested with *SYK*-directed shRNAs. (c) The effects of *SYK*-directed shRNA on 4E-BP1 phosphorylation were subtle or absent. The histograms for each condition are representative of at least two biological replicates across two *SYK*-directed shRNAs. The x-axis denotes expression (log scale) for each protein of interest and each is labeled with the median fluorescent intensity (MFI) per condition.

### **Supplementary Figure S6.**

Effects of GDC-0941 and Torin 1 treatment on 4E-BP1 phosphorylation in AML. Two AML cell lines treated for 24 hours with vehicle versus (a) GDC-0941 or (b) Torin 1. Activated 4E-BP1 was assessed by immunoblotting to p-4E-BP1 (Thr37/46).

### **Supplementary Figure S7.**

Inhibition by R406 and 4EGI-1 shows variable effects on individual gene expression. HL-60 and U937 were grown in the presence of R406, 4EGI-1 or R406 + 4EGI-1 for 3 days at which time, GE-HTS analysis was performed. The heat maps are derived from the resulting row-wise comparisons of the performance of individual genes in the signature. Red color indicates a relative increase in gene expression, whereas, blue indicates a relative decrease.

### **Supplementary Figure S8.**

Combined treatment with 4EGI-1 and R406 induces differentiation and inhibits proliferation. HL-60 and U937 cell lines were treated with 4  $\mu$ M R406, 25  $\mu$ M 4EGI-1 or a combination of these two molecules for 5 days before flow analysis of (a) myeloid differentiation markers (CD11b and CD14), (b) BrdU incorporation, and (c) apoptosis induction marker (active caspase 3).

### **Supplementary Figure S9.**

MEK inhibition blocks MAPK activation in RAS-mutated AML cell lines. AML cells were treated with vehicle or 4  $\mu$ M R406 alone, or in combination with the MEK inhibitor PD0325901



(100 nM) or the PI3K inhibitor GDC-0941 (500 nM) for 24 hours before western blot analysis with p-ERK1/2 (Thr202/Tyr204).

**Supplementary Figure S10.**

Effects of rapamycin on RPS6 and 4E-BP1 activation and differentiation in AML. (a) Two AML cell lines were treated with either vehicle (DMSO) or 10 nM rapamycin for 24 hours and levels of RPS6 and 4E-BP1 phosphorylation were assessed by intracellular phospho-flow cytometry. The histograms for each condition are representative of at least two biological replicates across up to 3 repeated experiments. The x-axis denotes expression (log scale) for each protein of interest, and each is labeled with the median fluorescent intensity (MFI) per condition. (b) Cells were treated with rapamycin or 4EGI-1 for 3 days and the Differentiation Score was determined. Data was analyzed and P-values determined as described in Figure 5. Statistical differences between all chemically-treated samples and DMSO-treated samples are displayed as P-value symbols.

## **Supplementary Table Legends**

### **Supplementary Table S1.**

Differentiation signature (32-gene signature). Listed are the gene names, Ref Seq numbers, Luminex LUA tags, and the probe sequence for the 32 myeloid differentiation signature genes.

### **Supplementary Table S2.**

Primary patient AML/MDS sample information including clinical diagnosis and cytogenetics.

### **Supplementary Table S3.**

Significance values for viability comparisons in Figure 4A. P value symbols are indicated for the various pairwise comparison tests. All comparisons for HL-60 are from the same experiment. The comparisons for U937 derive from two separate experiments. The first 9 rows show comparisons for U937 treated with GDC-0941 and 4EGI-1, and the last 5 rows show comparisons from Torin 1 treatment.
